# Supplementary material
Source: Springer Nature journal article supplement (https://www.springermedizin.de/resource/supplementary/12931_2010_1057_MOESM6_ESM.pdf/9425540)

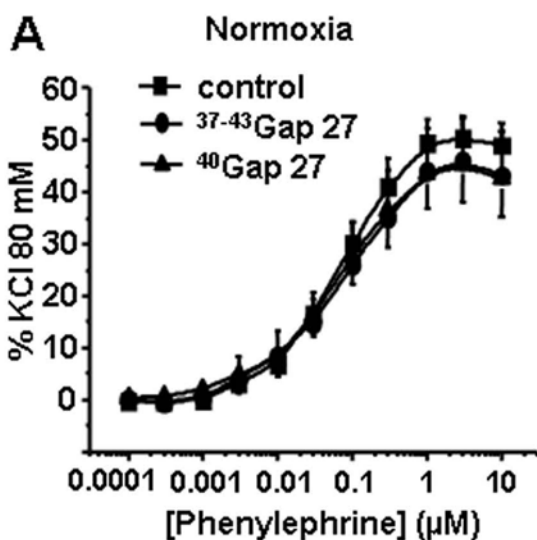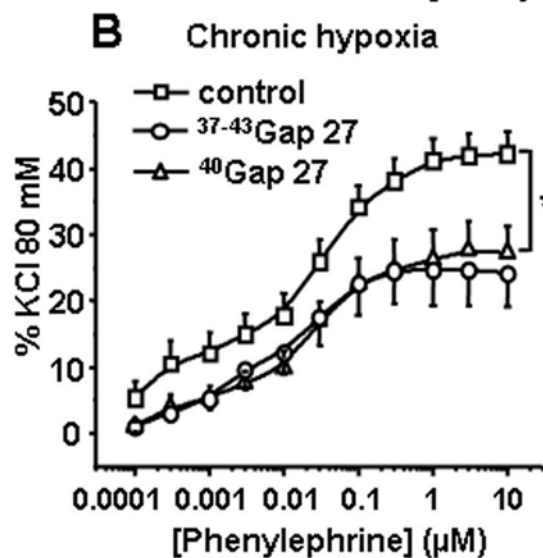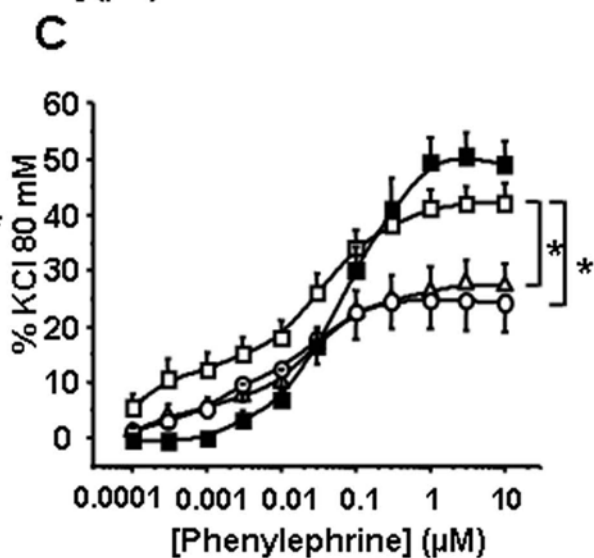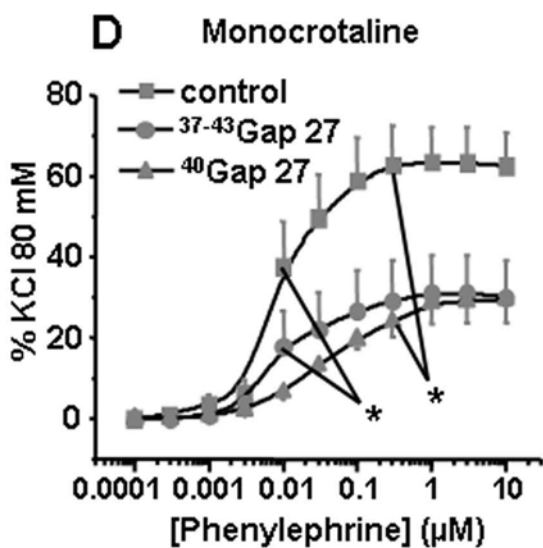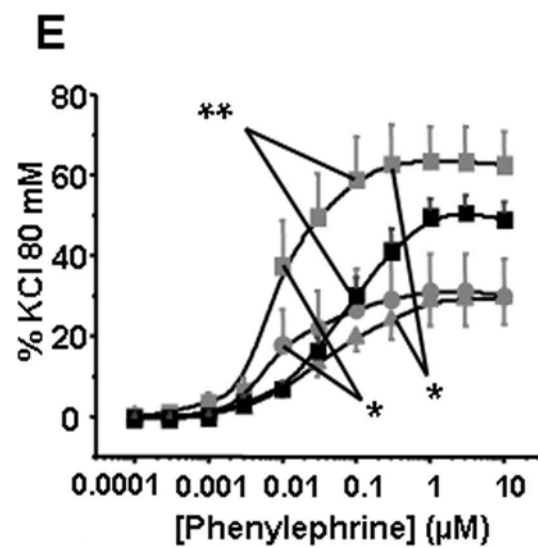

Supplement: MOESM6 [file 9425540]
